# Supplementary material for: Kinesin family member 14 in human oral cancer: A potential biomarker for tumoral growth
Source: PubMed Central journal article supplement — Biochem Biophys Rep. 2015 Jul 15;3:26–31. doi: 10.1016/j.bbrep.2015.07.008 (PMC5668670; doi:10.1016/j.bbrep.2015.07.008), 2015-07-15
Supplement: mmc3.pdf [file mmc3.pdf]

To view the full contents of this document, you need a later version of the PDF viewer. You can upgrade to the latest version of Adobe Reader from [www.adobe.com/products/acrobat/readstep2.html](http://www.adobe.com/products/acrobat/readstep2.html)

For further support, go to [www.adobe.com/support/products/acrreader.html](http://www.adobe.com/support/products/acrreader.html)
